# Supplementary material
Source: Elsevier journal article supplement (https://www.sciencedirect.com/science/article/pii/S0365669111000682)
Supplement: mmc1 [file S0365669111000682:mmc1.pdf]

## Anexo 1. Cuestionario EuroQol

**Marque con una cruz la respuesta de cada apartado que mejor describa su estado de salud en el día de HOY.**  
**No marque más de una casilla en cada grupo.**

### Movilidad

- No tengo problemas para caminar ☐ 1
- Tengo algunos problemas para caminar ☐ 2
- Tengo que estar en la cama ☐ 3

### Cuidado Personal

- No tengo problemas con el cuidado personal ☐ 1
- Tengo algunos problemas para lavarme o vestirme ☐ 2
- Soy incapaz de lavarme o vestirme ☐ 3

### Actividades Cotidianas (Ej.: trabajar, estudiar, hacer las tareas domésticas, actividades familiares o actividades durante el tiempo libre)

- No tengo problemas para realizar mis actividades cotidianas ☐ 1
- Tengo algunos problemas para realizar mis actividades cotidianas ☐ 2
- Soy incapaz de realizar mis actividades cotidianas ☐ 3

### Dolor/Malestar

- No tengo dolor ni malestar ☐ 1
- Tengo moderado dolor o malestar ☐ 2
- Tengo mucho dolor o malestar ☐ 3

### Ansiedad/Depresión

- No estoy ansioso ni deprimido ☐ 1
- Estoy moderadamente ansioso o deprimido ☐ 2
- Estoy muy ansioso o deprimido ☐ 3

Comparando con mi estado general de salud durante los últimos 12 meses, mi estado de salud hoy es: (POR FAVOR PONGA UNA CRUZ EN EL CUADRO)

- Mejor ☐ 1
- Igual ☐ 2
- Peor ☐ 3

Para ayudar a la gente a describir lo bueno o malo que es su estado de salud hemos dibujado una escala parecida a un termómetro en la cual se marca con un 100 el mejor estado de salud que pueda imaginarse y con un 0 el peor estado de salud que pueda imaginarse.

Nos gustaría que nos indicara en esta escala, en su opinión, lo bueno o malo que es su estado de salud en el día de HOY. Por favor, dibuje una línea desde el casillero donde dice "Su estado de salud hoy" (\*) hasta el punto del termómetro que en su opinión indique lo bueno o malo que es su estado de salud en el día de HOY.

**SU ESTADO  
DE SALUD  
HOY**

(\*) A veces se tiende a valorar el estado de salud actual haciendo una cruz o una marca en la EVA

**El mejor estado  
de salud  
imaginable**

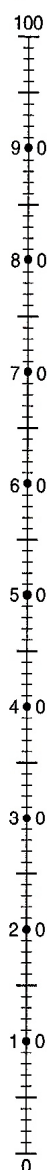

**El peor estado  
de salud  
imaginable**
